# Supplementary material
Source: Springer Nature journal article supplement (https://www.springermedizin.de/resource/supplementary/13058_2012_3585_MOESM9_ESM.pdf/9703868)

**A**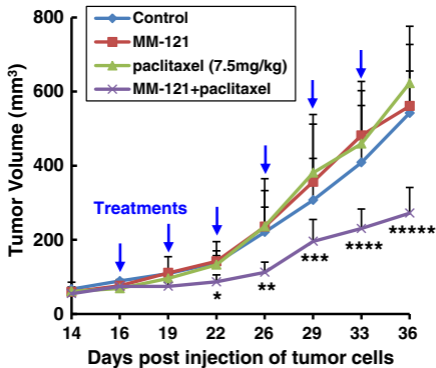**B**

PBS

MM-121

paclitaxel

MM-121+Pac

H&amp;E

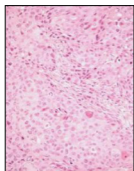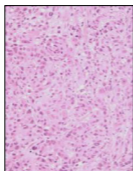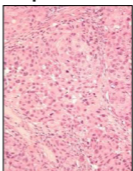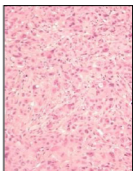

erbB2

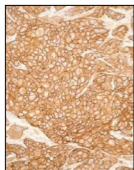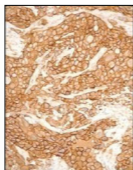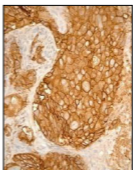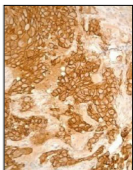

erbB3

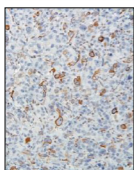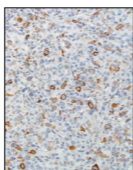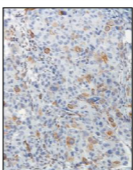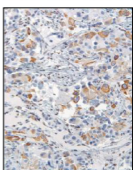

Supplement: MOESM9 [file 9703868]
